# Supplementary material for: Sb nanoparticles uniformly dispersed in 1-D N-doped porous carbon as anodes for Li-ion and Na-ion batteries
Source: Royal Society of Chemistry journal article supplement (doi:10.1039/c7ta03060f), 2017-01-01
Supplement: c7ta03060f1.pdf [file c7ta03060f1.pdf]

Electronic Supplementary Information

## Sb nanoparticles uniformly dispersed in 1-D N-doped porous carbon as anodes for Li-ion and Na-ion batteries

Qianqian Yang, Jie zhou, Genqiang Zhang, Cong Guo, Meng Li, Yongchun Zhu and Yitai Qian\*

Hefei National Laboratory for Physical Science at Microscale, Department of Chemistry, Department of Materials Science and Engineering, University of Science and Technology of China, 96 JinZhai Road, 230026, Hefei, China.

\*Corresponding Author

Yitai Qian, E-mail: ytqian@ustc.edu.cn

Yongchun Zhu, E-mail: ychzhu@ustc.edu.cn

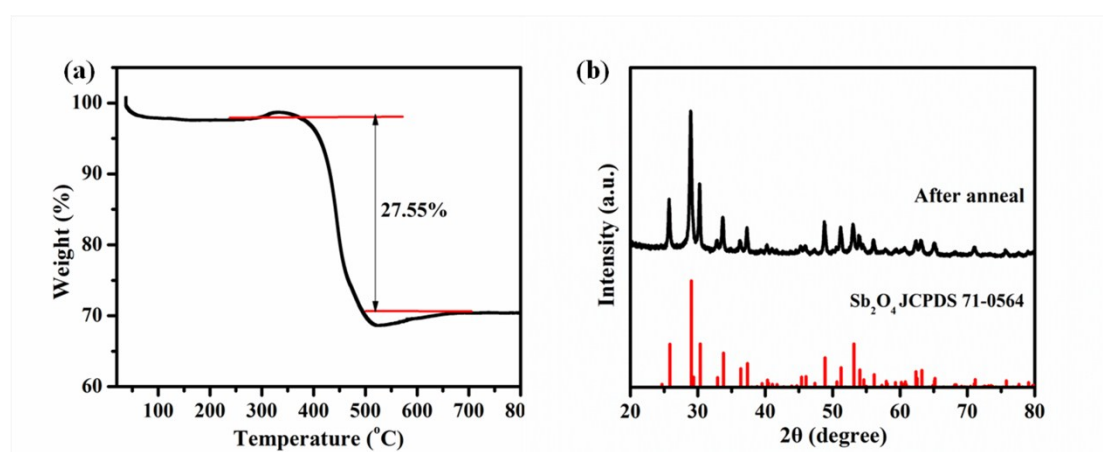

**Fig. S1.** (a) TGA curve of the Sb/NPC composite annealed in air from room temperature to 800 °C, (b) XRD patterns of the Sb/NPC composite after anneal in air.

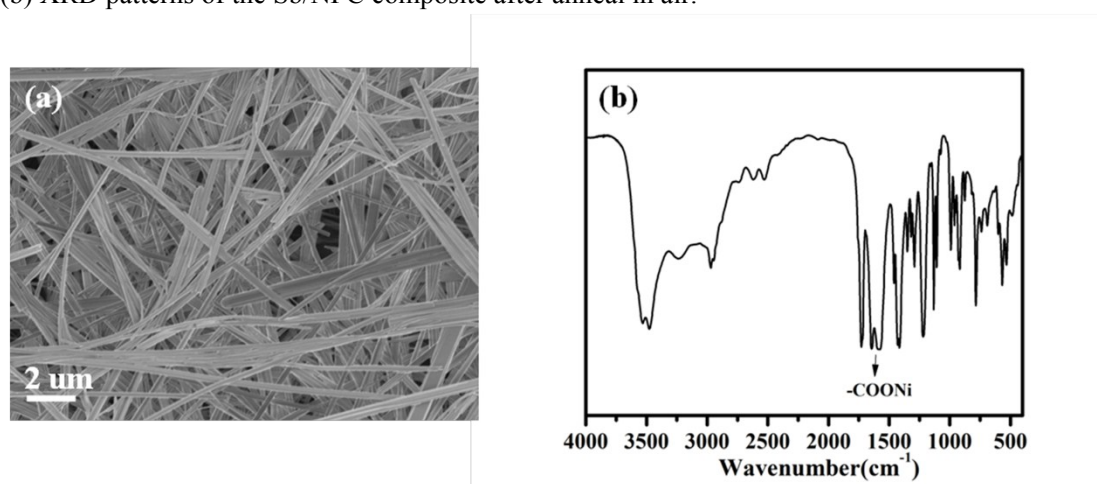

**Fig. S2.** SEM image (a) and Infrared (IR) spectra (b) of Ni-NTA precursor.

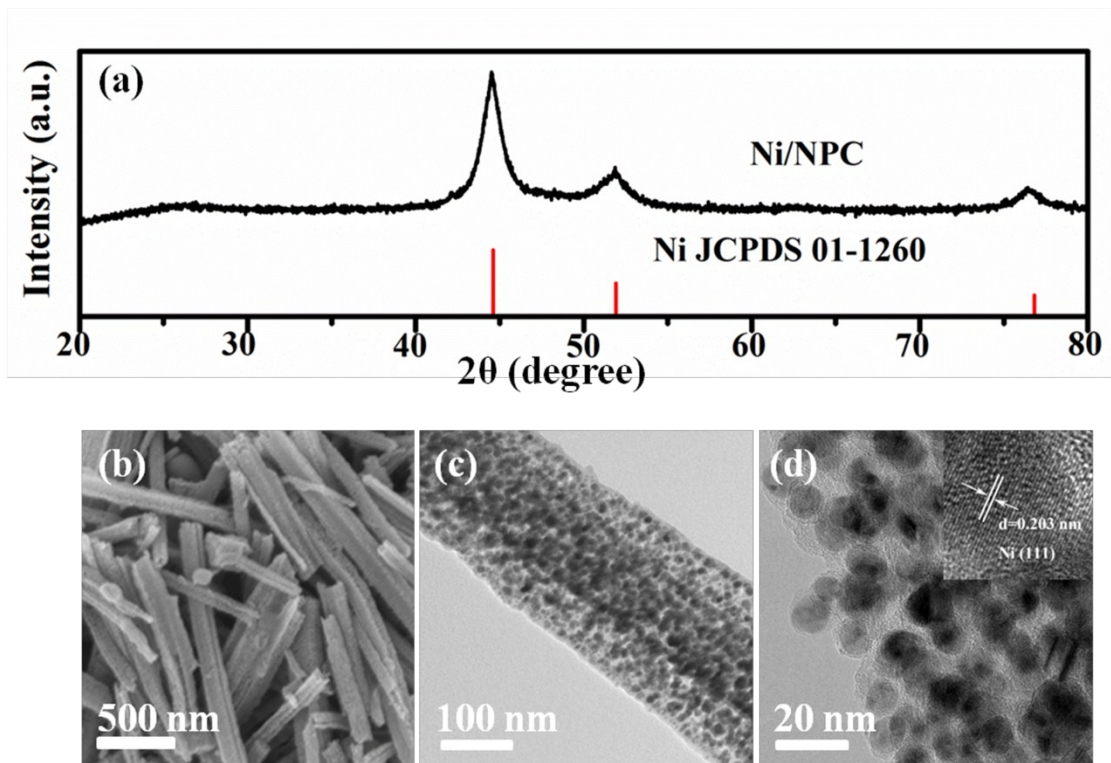

Fig. S3. XRD patterns (a), SEM and TEM images (b,c,d) of Ni/NPC.

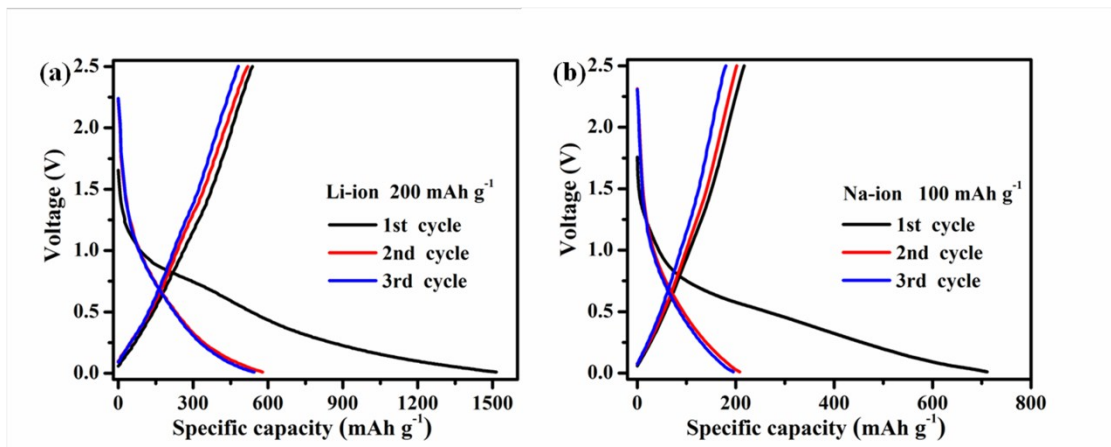

Fig. S4. The discharge/charge voltage profiles of NPC.

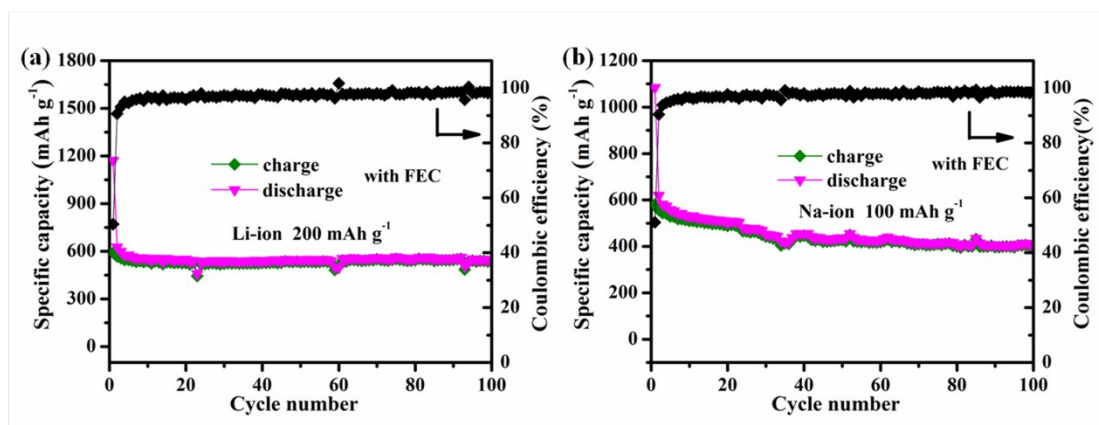

**Figure S5.** Cycling performances of the Sb/NPC composite in Li-ion battery (electrolyte : 1 M LiPF<sub>6</sub> dissolved in ethylene carbonate/dimethyl carbonate (EC/DMC = 1/1, V/V) with 5 % FEC additive) and (electrolyte : Na-ion battery 1.0 M NaClO<sub>4</sub> in an ethylene carbonate/dimethyl carbonate (EC/DMC = 1/1, V/V) with 5 % FEC additive).

**Table S1.** Comparison of the performances in this work with previously reported Sb/C composite for Li-ion batteries.

| Sb-based anodes                           | Reversible capacity (mAh g <sup>-1</sup> ) | Current density (mA g <sup>-1</sup> ) | Cycle number (cycles) | Ref.      |
|-------------------------------------------|--------------------------------------------|---------------------------------------|-----------------------|-----------|
| Sb/C composites                           | 466.2                                      | 100                                   | 200                   | [1]       |
| nanostructured Sb/carbon composite fibers | 315.9                                      | 100                                   | 100                   | [2]       |
| Sb/C polyhedra composite                  | 565                                        | 200                                   | 100                   | [7]       |
| RGO-Sb <sub>TF</sub> -Ni                  | 424.1                                      | 100                                   | 50                    | [8]       |
| hollow Sb@C yolk-shell spheres            | 405                                        | 1000                                  | 300                   | [9]       |
| graphene@NiSb/Sb@nickel foam              | 340                                        | 200                                   | 50                    | [10]      |
| Sb/graphene composites                    | 515                                        | 100                                   | 50                    | [11]      |
| 1-D Sb/NPC                                | 556                                        | 200                                   | 100                   | This work |

**Table S2.** Comparison of the performances in this work with previously reported Sb/C composite for Na-ion batteries.

| <b>Sb-based anodes</b>               | <b>Reversible capacity (mAh g<sup>-1</sup>)</b> | <b>Current density (mA g<sup>-1</sup>)</b> | <b>Cycle number (cycles)</b> | <b>Ref.</b> |
|--------------------------------------|-------------------------------------------------|--------------------------------------------|------------------------------|-------------|
| Sb–C nanofibers                      | 446                                             | 200                                        | 400                          | [3]         |
| Sb/C fibers                          | 422                                             | 350                                        | 300                          | [4]         |
| Sb NPs anchored on carbon nanofibers | 542.5                                           | 100                                        | 100                          | [5]         |
| Sb-carbon-graphene fibrous composite | 274                                             | 100                                        | 100                          | [6]         |
| hollow Sb@C yolk–shell spheres       | 280                                             | 1000                                       | 200                          | [9]         |
| graphene@NiSb/Sb@nickel foam         | 305                                             | 300                                        | 100                          | [10]        |
| Sb @C coaxial nanotubes              | 407                                             | 100                                        | 240                          | [12]        |
| spherical nano-Sb@C composite        | 385                                             | 100                                        | 500                          | [13]        |
| Sb/J-SP- $\alpha$                    | 280                                             | 300                                        | 160                          | [14]        |
| 1-D Sb/NPC                           | 400.9                                           | 100                                        | 100                          | This work   |

## References

1. Y. Cheng, Z. Yi, C. Wang, L. Wang, Y. Wu and L. Wang, *Chemistry–An Asian Journal*, 2016, **11**, 2173-2180.
2. H. Lv, S. Qiu, G. Lu, Y. Fu, X. Li, C. Hu and J. Liu, *Electrochimica Acta*, 2015, **151**, 214-221.
3. L. Wu, X. Hu, J. Qian, F. Pei, F. Wu, R. Mao, X. Ai, H. Yang and Y. Cao, *Energy & Environmental Science*, 2014, **7**, 323-328.
4. Y. Zhu, X. Han, Y. Xu, Y. Liu, S. Zheng, K. Xu, L. Hu and C. Wang, *ACS nano*, 2013, **7**, 6378-6386.
5. H. Hou, M. Jing, Y. Yang, Y. Zhang, W. Song, X. Yang, J. Chen, Q. Chen and X. Ji, *Journal of Power Sources*, 2015, **284**, 227-235.
6. K. Li, D. Su, H. Liu and G. Wang, *Electrochimica Acta*, 2015, **177**, 304-309.
7. Z. Yi, Q. Han, P. Zan, Y. Wu, Y. Cheng and L. Wang, *Journal of Power Sources*, 2016, **331**, 16-21.
8. Z. Yi, Q. Han, Y. Cheng, F. Wang, Y. Wu and L. Wang, *Electrochimica Acta*, 2016, **190**, 804-810.
9. J. Liu, L. Yu, C. Wu, Y. Wen, K. Yin, F.-K. Chiang, R. Hu, J. Liu, L. Sun and L. Gu, *Nano Letters*, 2017, **17**, 2034-2042.
10. Y. L. Ding, C. Wu, P. Kopold, P. A. van Aken, J. Maier and Y. Yu, *Small*, 2015, **11**, 6026-6035.
11. Y. Yi, H.-W. Shim, S.-D. Seo, M. A. Dar and D.-W. Kim, *Materials Research Bulletin*, 2016, **76**, 338-343.
12. Z. Liu, X.-Y. Yu, X. W. D. Lou and U. Paik, *Energy & Environmental Science*, 2016, **9**, 2314-2318.
13. N. Zhang, Y. Liu, Y. Lu, X. Han, F. Cheng and J. Chen, *Nano Research*, 2015, **8**, 3384-3393.
14. X. Zhao, S. A. Vail, Y. Lu, J. Song, W. Pan, D. R. Evans and J.-J. Lee, *ACS applied materials & interfaces*, 2016, **8**, 13871-13878.
